# Supplementary material for: Transnational Ainu media: YouTube Itak before and after 2019
Source: Research Square preprint supplement (doi:10.21203/rs.3.rs-8265421/v1), 2026-01-14
Supplement: Supplementary file 1 [file 60095beac939d01a6d6a042b.docx]

**Table 1** Data obtained with the YouTube application programming interface

| **Data Name** | **Description** |
| --- | --- |
| Published Date | Date when a video was published in YouTube |
| Video Title | Title that appears below the video |
| Video Description | Description that appears below the title (if provided) |
| Tags | Keywords written by whoever uploaded the video (if provided) |
| Definition | Whether the video is in Standard (SD) or High Deﬁnition (HD) |
| View Count | Number of views |
| Like Count | Number of likes |
| Dislike Count | Number of dislikes |
| Comment Count | Number of comments |
