# Supplementary material for: Transnational Ainu media: YouTube Itak before and after 2019
Source: Research Square preprint supplement (doi:10.21203/rs.3.rs-8265421/v1), 2026-01-14
Supplement: Supplementary file 2 [file cf88d080e224c3baa81d519a.docx]

**Table 2** Data veriﬁed by humans

| **Data Name** | **Description** |
| --- | --- |
| Release Date | Date that the media was released to the public |
| Conceptualisers | Those who had the original idea and/or the materials for the media |
| Producers | Those who produced and/or paid the media |
| Broadcasters | Those who uploaded the media to YouTube. |
| Presenters | People appearing/heard in the media |
| Place | Place where the media was recorded (country, region of Japan, region of Hokkaido) |
